# Supplementary material
Source: PubMed Central journal article supplement (PMC5846810)
Supplement: gim201797x1.pdf [file gim201797x1.pdf]

# SUPPLEMENTAL FIGURES

**A**

|                      | CNVs.DGV                            | Total.CNVs.lit       | Unique.CNVs.lit      |
|----------------------|-------------------------------------|----------------------|----------------------|
| Gene.size            | <b>0.40 (2.00*10<sup>-16</sup>)</b> | <b>0.13 (0.0087)</b> | <b>0.14 (0.0035)</b> |
| Total.repeats        | <b>0.19 (9.80*10<sup>-6</sup>)</b>  | 0.016 (0.75)         | 0.025 (0.62)         |
| Alu.repeats          | 0.042 (0.34)                        | -0.051 (0.30)        | -0.048 (0.33)        |
| LINE and LTR.repeats | <b>0.30 (9.35*10<sup>-12</sup>)</b> | <b>0.11 (0.029)</b>  | <b>0.13 (0.011)</b>  |
| SDs                  | 0.045 (0.33)                        | 0.092 (0.073)        | 0.080 (0.12)         |

**B**

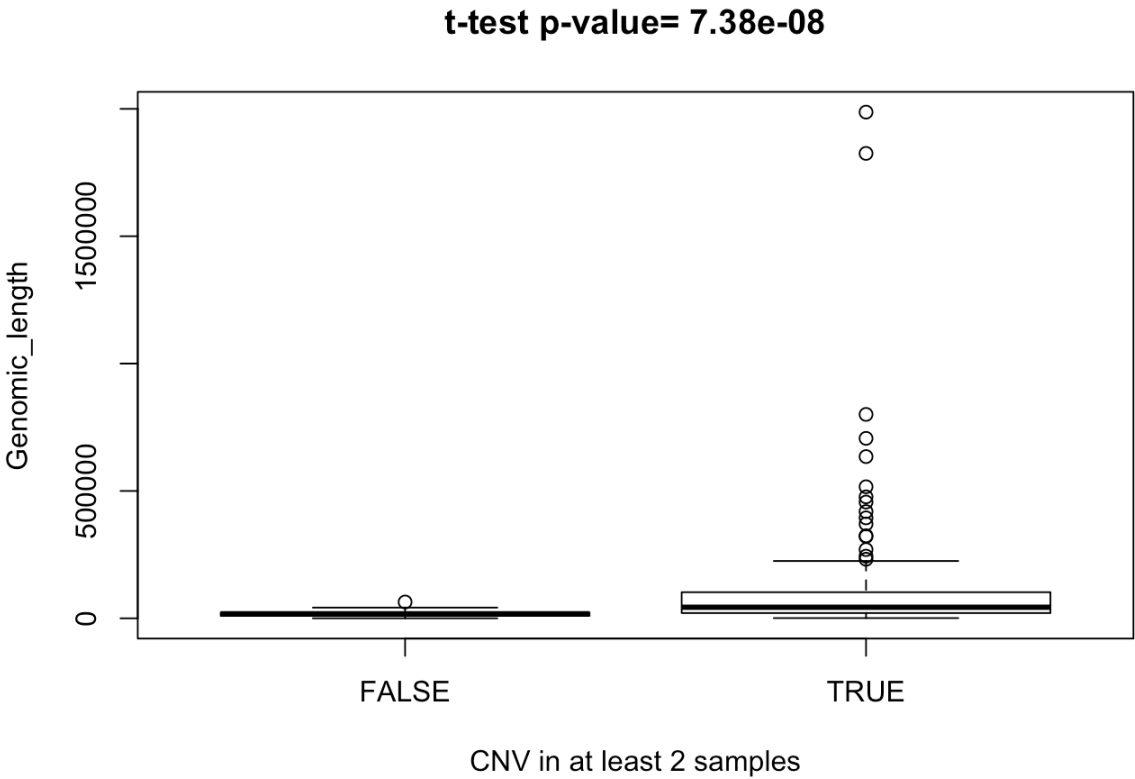

t-test p-value= 7.38e-08

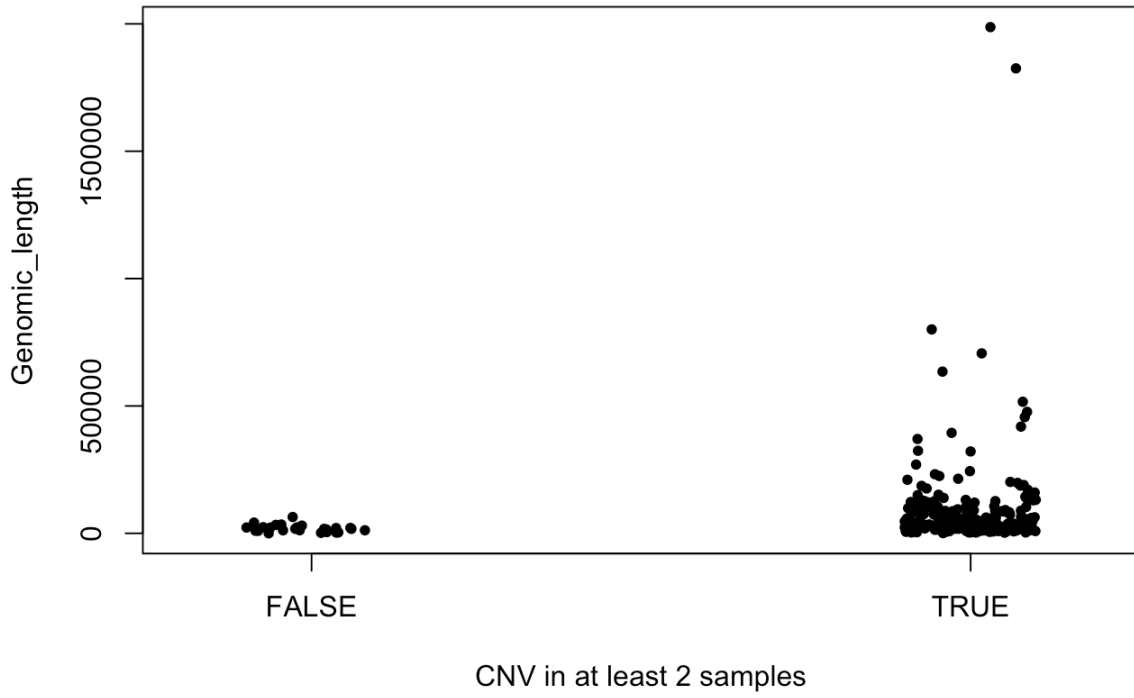

t-test p-value= 4.62e-05

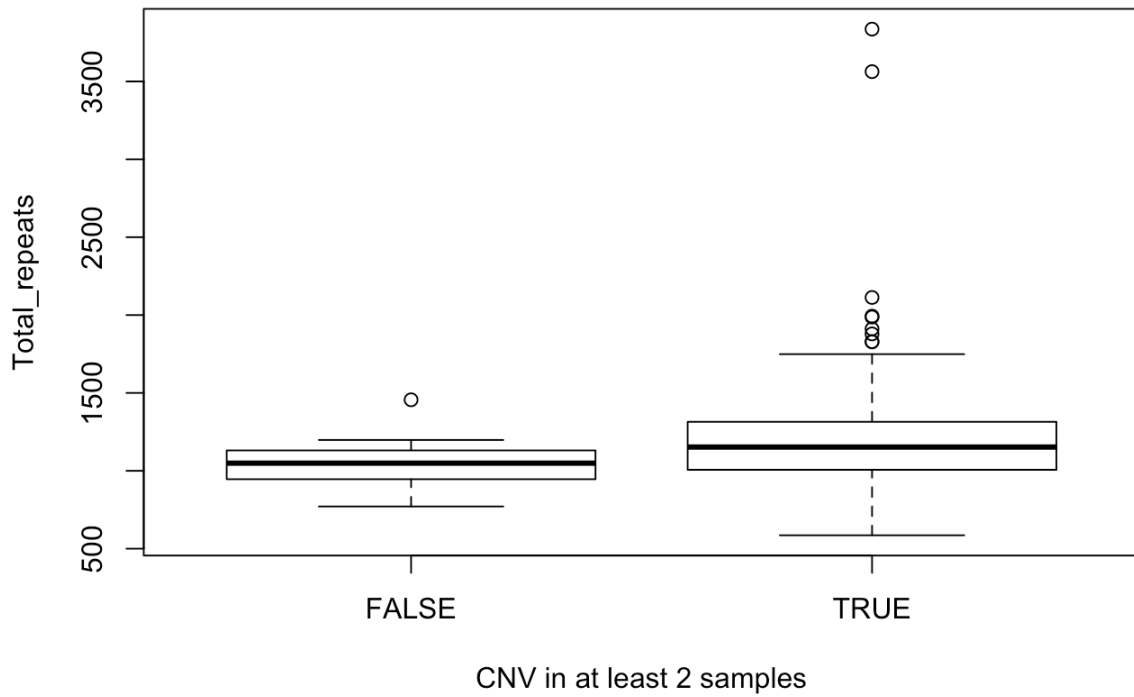

**t-test p-value= 4.62e-05**

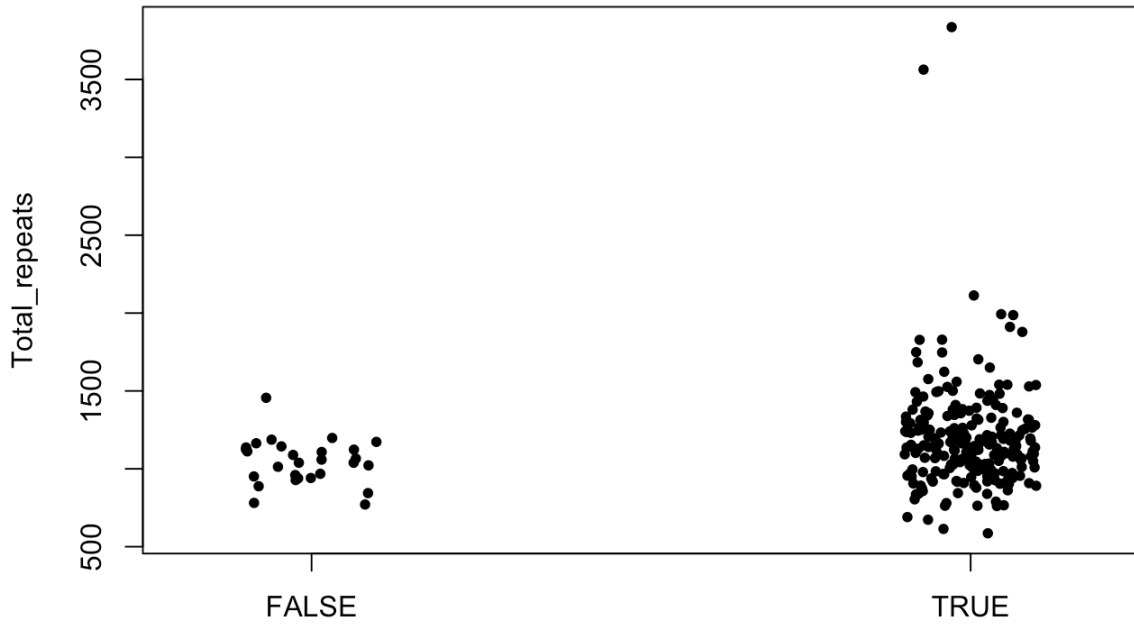

CNV in at least 2 samples

**t-test p-value= 0.233**

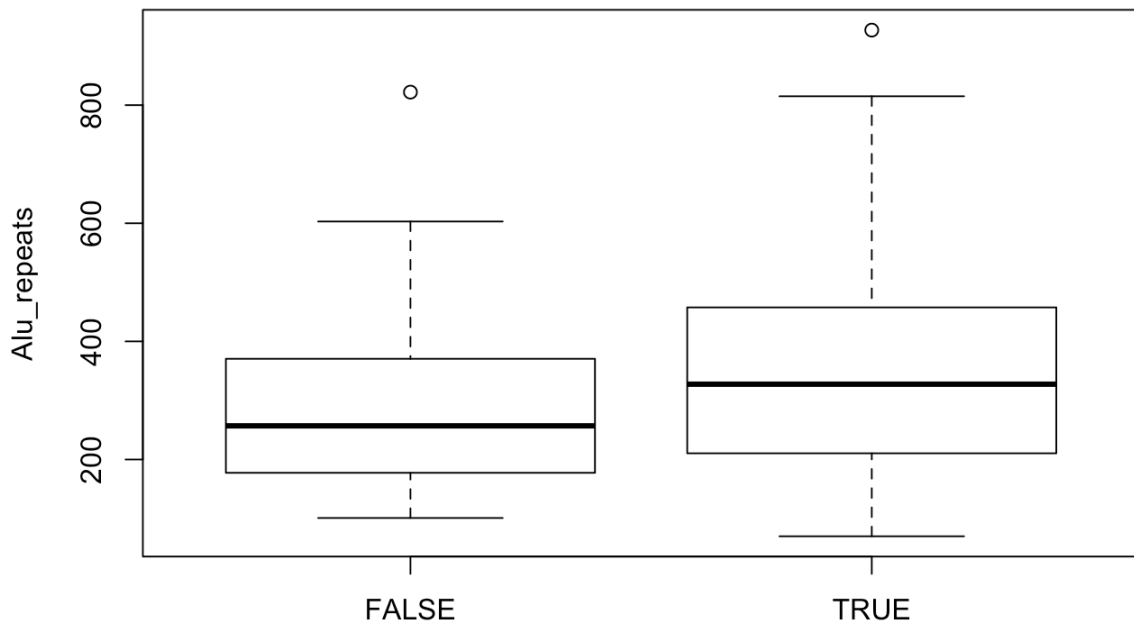

CNV in at least 2 samples

t-test p-value= 0.233

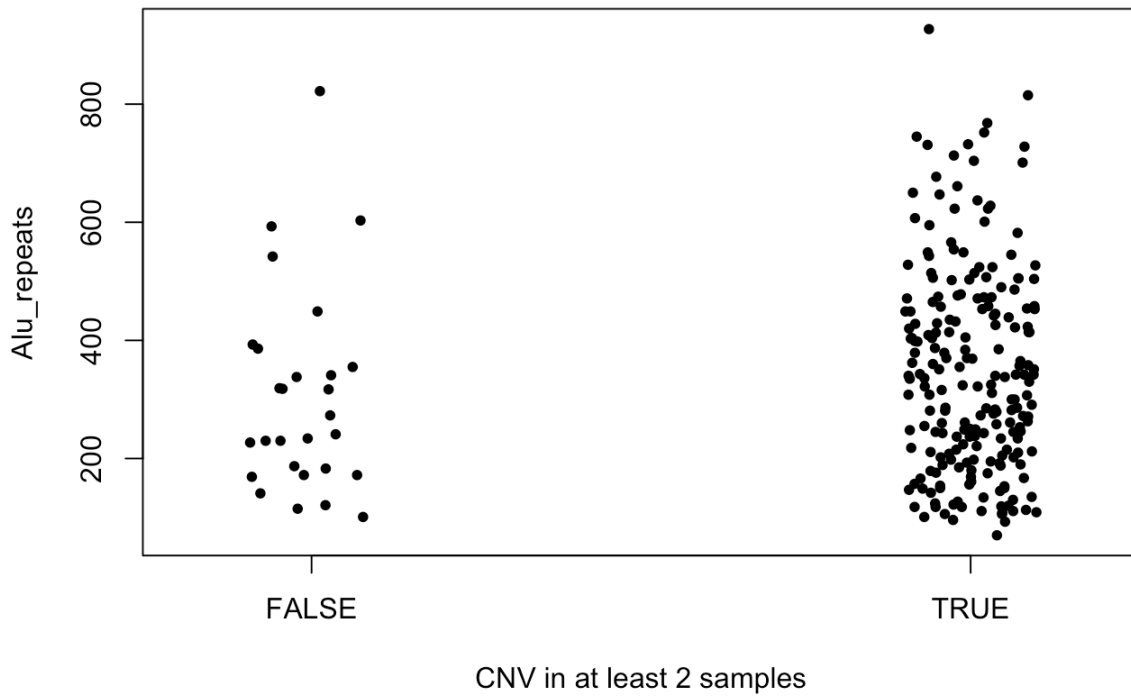

t-test p-value= 0.000247

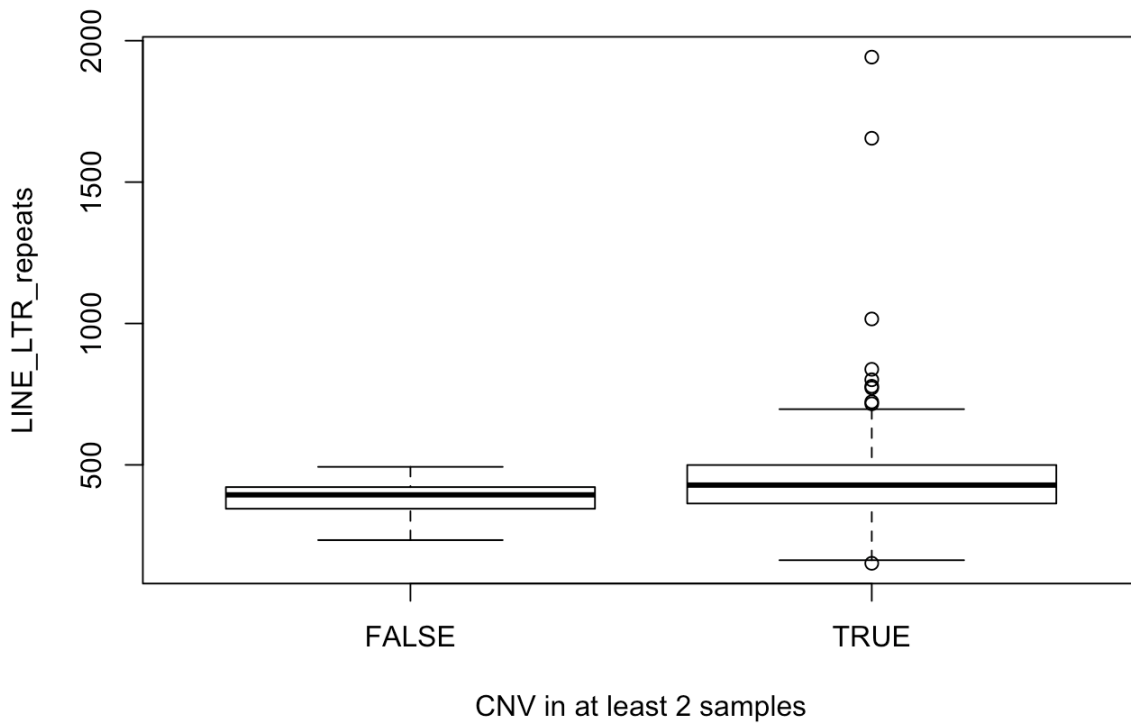

t-test p-value= 0.000247

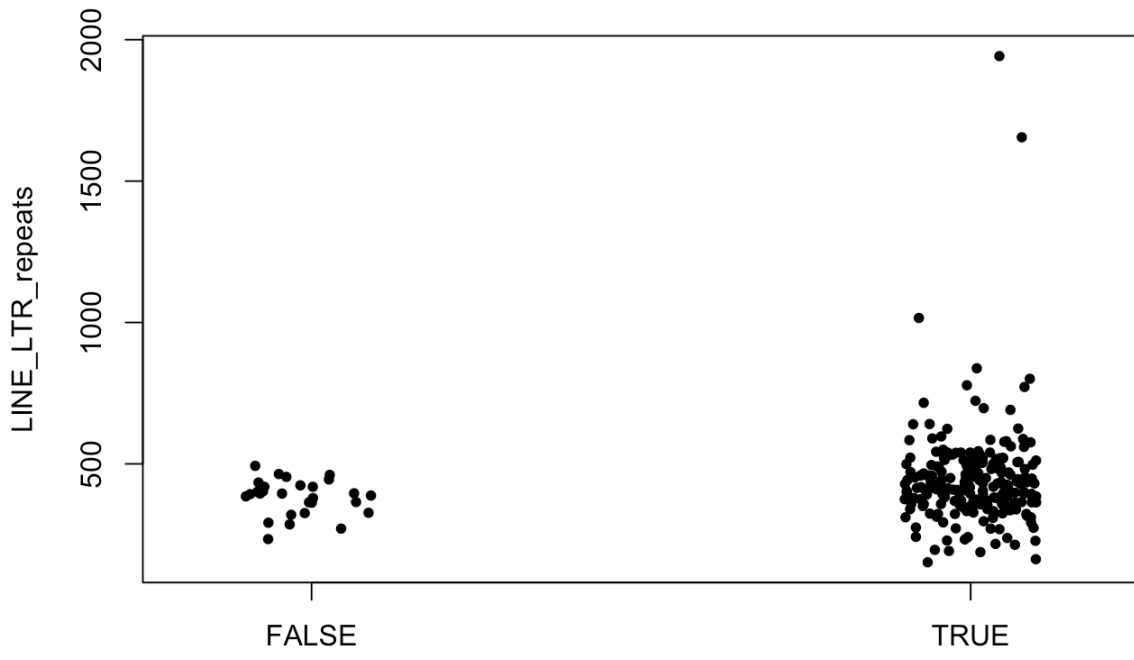

CNV in at least 2 samples

t-test p-value= 0.0561

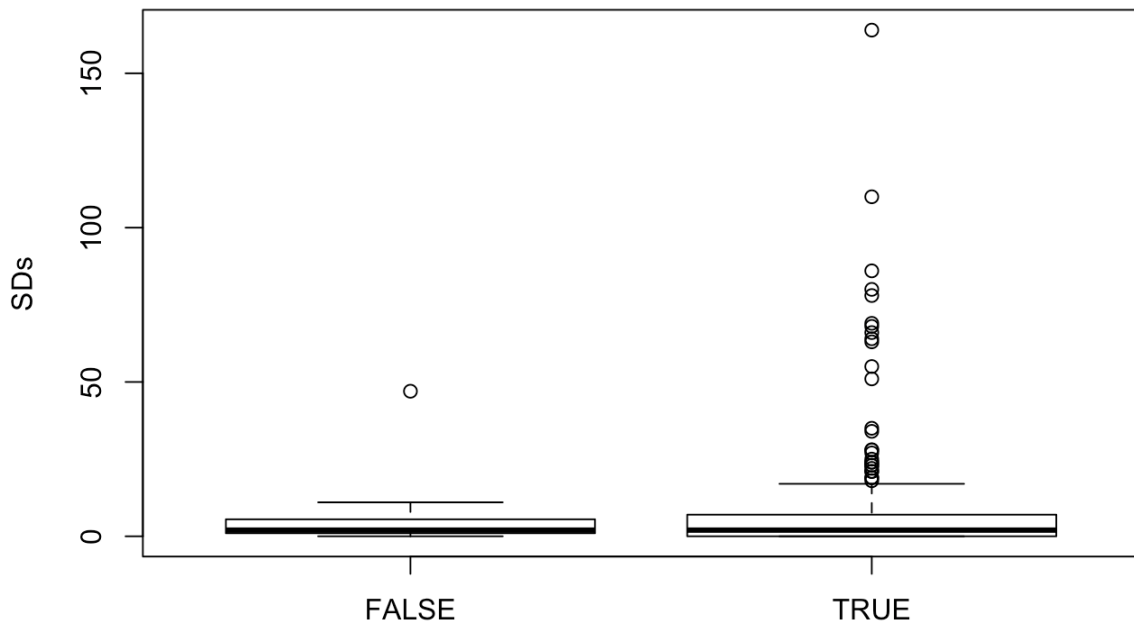

CNV in at least 2 samples

t-test p-value= 0.0561

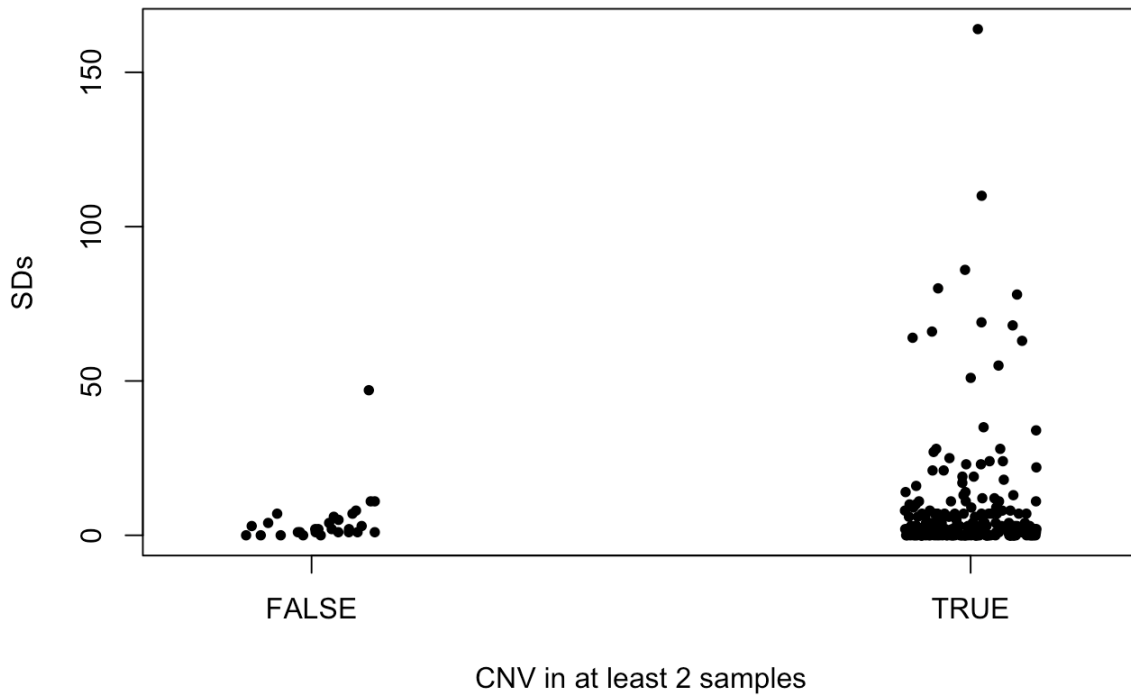

C

|                  | Gene.size   | Total.repeats | Alu.repeats   | LINE+LTR repeats | SDs          |
|------------------|-------------|---------------|---------------|------------------|--------------|
| Gene.size        | <b>1.00</b> | <b>0.81</b>   | <b>0.038</b>  | <b>0.89</b>      | <b>0.034</b> |
| Total.repeats    | <b>0.81</b> | 1.00          | 0.49          | 0.78             | 0.060        |
| Alu.repeats      | 0.038       | 0.48          | 1.00          | -0.083           | 0.11         |
| LINE+LTR.repeats | <b>0.89</b> | <b>0.78</b>   | <b>-0.083</b> | <b>1.00</b>      | <b>0.014</b> |
| SDs              | 0.034       | 0.060         | 0.11          | 0.014            | 1.00         |

Figure S1. Overview of the results of the statistical analyses

**A. Kendall rank correlation coefficient.** Rank correlation analysis was performed using the Kendall rank correlation coefficient or tau. The table lists all tau values with their respective p-values. If tau equals 1, both compared datasets are completely concordant, while tau = -1 is obtained with two completely discordant datasets and datasets that are not correlated lead to tau = 0. All correlations with tau > 0.1 are indicated in bold and are statistically significant (p-value < 0.05).

- B. Genomic feature vs. the presence of at least two CNVs.** Calculation of the statistical difference of the values of the different genomic features between the group of genes with one or less CNVs and the group of genes with at least 2 CNVs was performed using a classic t-test. For each comparison a box plot and a scatter plot are shown, together with the respective p-value. 'Genomic length' corresponds with gene size.
- C. Correlation of the different genomic features.** Pearson correlation coefficients were calculated to assess which genomic features are correlated with each other. A value of 1 indicates a total positive linear correlation, 0 is no linear correlation, and -1 represents total negative correlation.

## Pseudohomozygosity

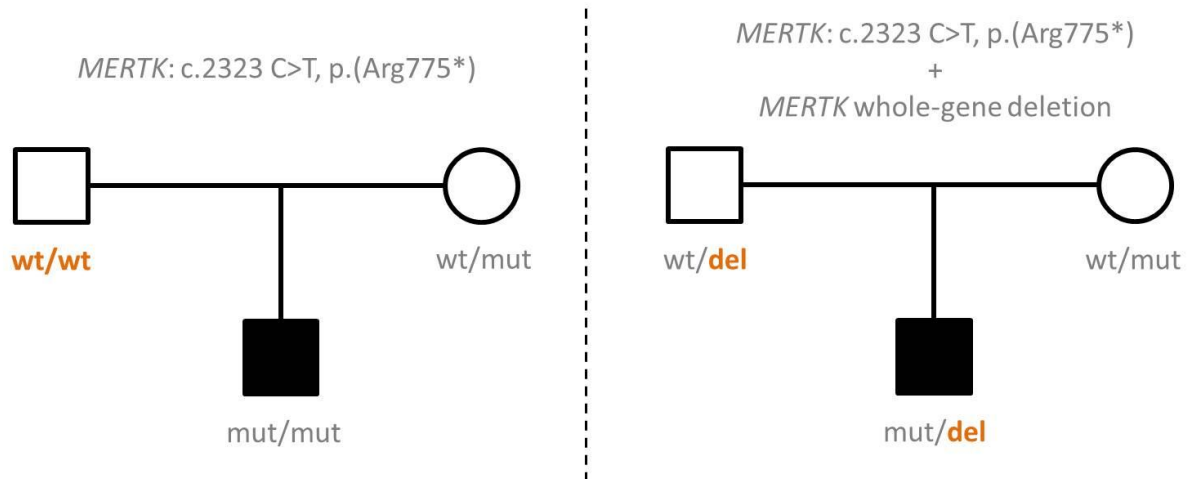

**Figure S2. Pseudohomozygosity in patient with whole gene deletion of *MERTK*.**

An apparently homozygous nonsense mutation in the *MERTK* gene was initially identified in P6: c.2323C>T, p.(Arg775\*) (mut/mut). Segregation analysis demonstrated a recessive carrier state in the mother (wt/mut) but not in the biologically proven father (wt/wt), indicating pseudohomozygosity and illustrated in the left panel. This was confirmed by qPCR analysis, revealing a heterozygous whole gene deletion of *MERTK* in both the index patient (mut/del) and his father (wt/del), represented in the right panel. Wt, wild type; mut, mutation; del, deletion.



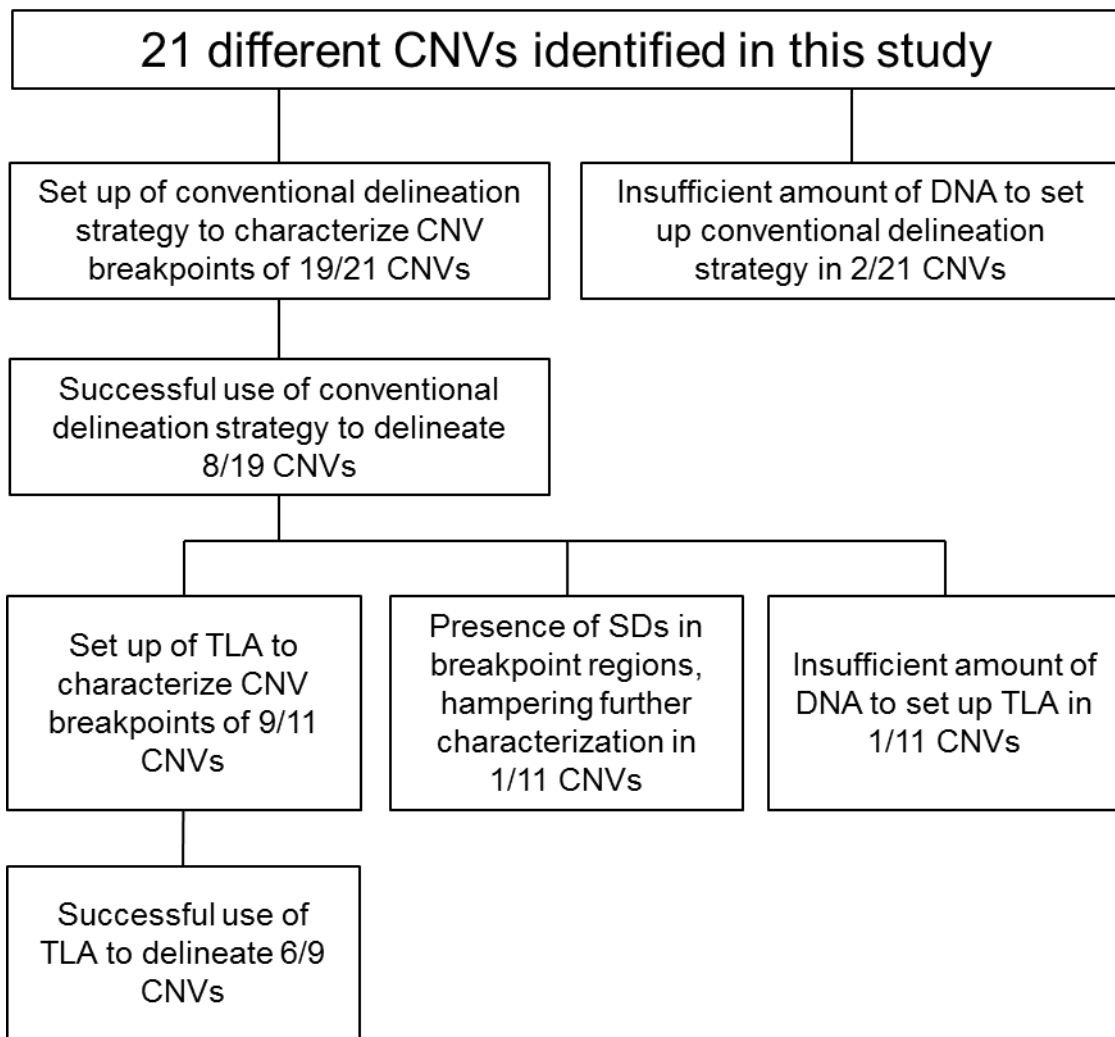

**Figure S3. Flowchart of characterization of CNVs.**

Flowchart illustrating the number of CNVs delineated at the nucleotide level using either a conventional delineation strategy or TLA.

## Pseudohomozygosity P5

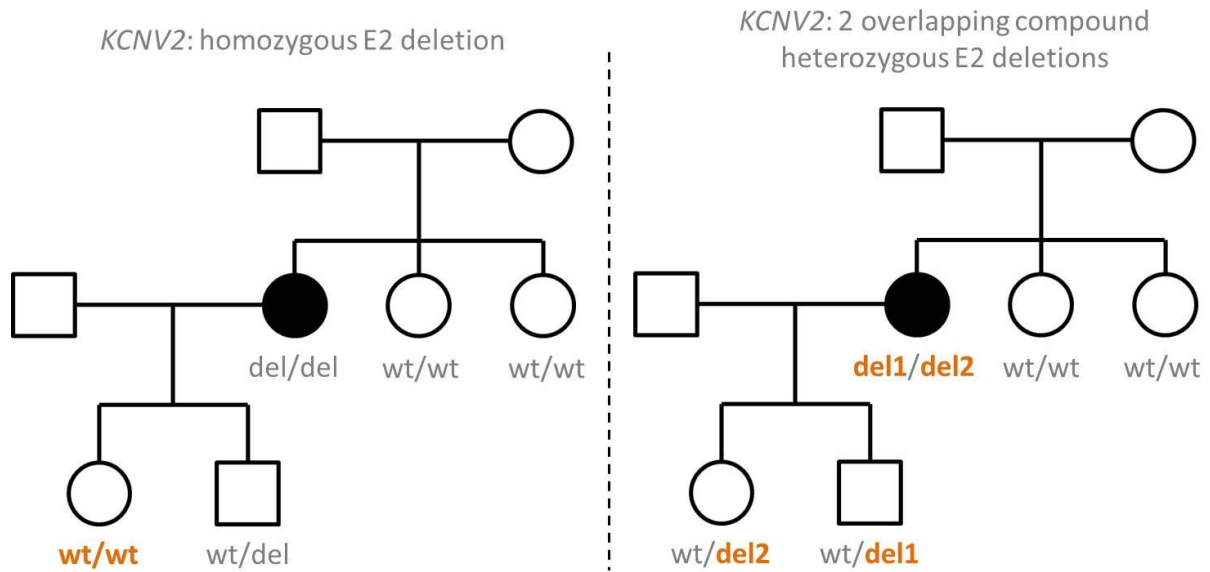

**Figure S4. Pseudohomozygosity in patient with overlapping *KCNV2* deletions.**

In patient P5 we first performed *KCNV2* mutation screening by PCR and Sanger sequencing. Non-amplification of exon 2 of the gene suggested a homozygous deletion (del/del). After delineation of the deletion, segregation analysis was performed in the family using the junction PCR primers. Although both children of the index patient are obligate carriers of this deletion, segregation of the junction product could only be demonstrated in one of the children (wt/del), illustrated in the left panel. Subsequent qPCR of exon 2 of *KCNV2* in the daughter demonstrated a heterozygous deletion of this exon. The most probable explanation for this finding is the occurrence of two different overlapping heterozygous deletions, only one of which was identified by the initial delineation. This was corroborated using qPCR, revealing a second larger deletion overlapping with the smaller one found in the index case (del 1/del 2) and in the daughter (wt/del2), represented in the right panel. Wt, wild type; del, deletion; E, exon.

## Microhomology

**BEST1 deletion (E1-2): chr11: g.61711373\_61719810del**

Proximal cataagtggaaaaggtgaatTTTAcaggacacggattGCCcctcaatatt  
Deletion cataagtggaaaaggtgaatTTTAcaggacacggattGCCcctcaatatt  
Distal gaatcccacacagactcataggcccacatagTAcattaaaaaagagagag

Proximal aaaattataaaaaaaagactggaaGGAaatacatcaaaatgataaccttg  
Deletion aaaattataaaaaaaagactggaaGGAgtctcactgtgttGtccaggctg  
Distal agagagagagagagagagagagatGGAgtctcactgtgttGtccaggctg

Proximal TTTgggagTTTgTTTTgTTTTgTTTTaaactgctctgtagTTTcctaatt  
Deletion gtctcgaactcctagggtcaagcaatCCCCctgccttagcctcccaaggg  
Distal gtctcgaactcctagggtcaagcaatCCCCctgccttagcctcccaaggg

**KCNV2 deletion 1 (E2): chr9: g.2723737\_2766822del**

Proximal acatggaagcaataacCTTtgcttctacattcattTggaagaaaataaa  
Deletion acatggaagcaataacCTTtgcttctacattcattTggaagaaaataaa  
Distal ctatacatgctgctatgtctctatacatgctgctagtattaggaagttt

Proximal acagaaatgattctTTTTtctactgAGGaaaagaagaacctataaaacat  
Deletion acagaaatgattctTTTTtctactgAGCTaaaacggtcataaatttgatgt  
Distal aacctcaaaaagtttcccagagttAGCTaaaacggtcataaatttgatgt

Proximal acgagaaggTcagctgTtccctcatgggagaactTctgagagtccagata  
Deletion ggaaaaataattgcttCagtatagtcaaggaagacaactaggaatataa  
Distal ggaaaaataattgcttCagtatagtcaaggaagacaactaggaatataa

**KCNV2 deletion 2 (E2): chr9: g.2724293\_2730624del**

Proximal TTTTgtcccagagacCTTgctcccatctTTTctTTTccctaaggTatgTTTT  
Deletion TTTTgtcccagagacCTTgctcccatctTTTctTTTccctaaggTatgTTTT  
Distal aaattgTTTaaTgTgTatgtTatctagTgaaatctctagaccagTggtTct

Proximal cattaCcttgccaataggTggcactTacaagatcactgaaattatTTTat  
Deletion cattaCcttgccaataggTggcactccagctaatgcctagagatggtTTT  
Distal caaaggcaaaattcattcctcagagggccagctaatgcctagagatggtTTT

Proximal TTTTgttcattgattgctTTTgaggaaaccattTgaaaaataaattaggt  
Deletion gattgccaataaccgtgaggggcaataagggagactTctggcatctaggag  
Distal gattgccaataaccgtgaggggcaataagggagactTctggcatctaggag

**PCDH15 deletion (E1): chr10: g.56478660\_57777934del**

Proximal agtagctggcactacaggcacaccaccatgtccagctaatttttgat  
Deletion agtagctggcactacaggcacaccaccatgtccagctaatttttgat  
Distal atataaatttttaaaataaccatttacagtaacatccaaaaataaaataa

Proximal ttttagtagagacggggtttcaactATGttggccaggetggttettgaactc  
Deletion ttttagtagagacggggtttcaactATGagttgaaagatctatgtactaaa  
Distal aatatcaagaaataaaatttatccaATGagttgaaagatctatgtactaaa

Proximal ctgacgtcctgatccaccgcctcagtctccaaagtgctaggattacag  
Deletion aatttcagaaaattgatgcaaaaaattgaagaaaacaaaaataaatggaa  
Distal aatttcagaaaattgatgcaaaaaattgaagaaaacaaaaataaatggaa

**PDE6G deletion (E3-4): chr17: g.79612725\_79619171del**

Proximal catccttgcccttctggtgcttgaggccgtggcgggggcccctggtggtgg  
Deletion catccttgcccttctggtgcttgaggccgtggcgggggcccctggtggtgg  
Distal tttgtgcataagagtgatgcccggtgtgtgcgcacacgtgtgagtgga

Proximal ccctctggggcccgtgcaagacaGCctggagcacaccctgcggtgtggcc  
Deletion ccctctggggcccgtgcaagacaGCggtgcctgtgtgcgcacacgagtg  
Distal actcctcgggtgcggttgatgggagcGCggtgcctgtgtgcgcacacgagtg

Proximal atcgcccactaccaggaacgaccagacctgcgcttctcctcgaccaagt  
Deletion agtggacactcctcgggtgactgatgggagcgagatgcccggtgtgtgccc  
Distal agtggacactcctcgggtgactgatgggagcgagatgcccggtgtgtgccc

**PRPH2 deletion (E1-3): chr6: g.42631162\_42716988delinsTATTTTT**

Proximal ccctttgtgaatgcttgagtaataactgttattcctctgctgcttccctcc  
Deletion ccctttgtgaatgcttgagtaataactgttattcctctgctgcttccctcc  
Distal ttccaacatatataacatggagaggggtattagaatagtgttccaaggact

Proximal aagaaatatttttaacaagtaa-----gttttggetcatgacaactat  
Deletion aagaaatatttttaacaagtaaTATTTTTaacaactgccaactgatgta  
Distal cacatacccatcaccagcttc-----aacaactgccaactgatgta

Proximal taaaaagcaatagtttgctttgaagataatgaaataataaatcaaggagg  
Deletion agtaaataagccaggaacagaaagaaaaatatcacatggttctcactcgta  
Distal agtaaataagccaggaacagaaagaaaaatatcacatggttctcactcgta

**USH2A deletion (E3): chr1: g.216589227\_216593365del**

Proximal gaaccactgcgcctggcctccattatcttataacaacttttgagtaat  
Deletion gaaccactgcgcctggcctccattatcttataacaacttttgagtaat  
Distal tgtatgtatatttggataaaagttagtgagtgcaagtatatttttaattta

Proximal cagtacattcctttttcaaaaatctAGGctgggcaactctggetcatgcctg  
Deletion cagtacattcctttttcaaaaatctAGGttttatataagtagaataaaaag  
Distal ggcaaatagatttagatgacataaAGGttttatataagtagaataaaaag

Proximal taataccatcactttgggaggccaaggcaggtggatcacctgaggtcagg  
Deletion ttttatataaattctactgcaaattatatttttaacccttcagtagttga  
Distal ttttatataaattctactgcaaattatatttttaacccttcagtagttga

**USH2A deletion (E5-10): chr1: g.216465309\_216507632del**

Proximal ttagtcaaagtgtgtgaactctttaaaaaacaaaacaaaacaaca  
Deletion ttagtcaaagtgtgtgaactctttaaaaaacaaaacaaaacaaca  
Distal aacaaaactatataggtgcaaaattttgcatactcttaaattaagttg

Proximal acaacaaaatccttttctgaaaagatatagtttaagactagagtgetat  
Deletion acaacaaaatccttttctgaaaaggaattaagatgttaatgataacatc  
Distal gtattaatttgaattagatttttatgaattaagatgttaatgataacatc

Proximal ttctgaaaactacctagtgatttggaaataggaagatttggggaactagc  
Deletion ctgggcaacaaacatagtagaataaatgacaagggtattaattatacac  
Distal ctgggcaacaaacatagtagaataaatgacaagggtattaattatacac

**USH2A deletion (E12-13): chr1: g.216415487\_216435280del**

Proximal tcaacttgcataactacaataataataattcctcactttgggaggcct  
Deletion tcaacttgcataactacaataataataattcctcactttgggaggcct  
Distal gataactcactcaataagcctgattccagtaaagtcatgtcactgctgcc

Proximal aggcaggcagatcacgaagtcaggaGatcgagaccatcctggctaacacg  
Deletion aggcaggcagatcacgaagtcaggaCaagcattcacaacattactgaca  
Distal acaactcccacaggttaggtcagtCaagcattcacaacattactgaca

Proximal gtgaaaccccatctctgctttaaaaaaaaaaaaaaaaatacaaaaaattagcc  
Deletion tggattacagttgaagaaaacttcacagagactacactactgtgccactc  
Distal tggattacagttgaagaaaacttcacagagactacactactgtgccactc

**USH2A deletion (E22-24): chr1: g.216259404\_216323160del**

Proximal tattttaacttctctgggagagacttgggaggcaccctgtgattcttaatg  
Deletion tattttaacttctctgggagagacttgggaggcaccctgtgattcttaatg  
Distal acaacctagctggacgatcagttcttgtaagaatctgaccctcaaact

Proximal aggacttgggaaacaatcctagaaTAtttagcattgctgttgaagggatg  
Deletion aggacttgggaaacaatcctagaaTActtagtcatctatagtaccccgac  
Distal ctataacctcaatggaccggaccTActtagtcatctatagtaccccgac

Proximal ttttttctctatctaagggttaattccattcatgttcattttaattagttt  
Deletion tgccgtccgctgcaggatcctccccactgggttcaccattccagaataa  
Distal tgccgtccgctgcaggatcctccccactgggttcaccattccagaataa

**USH2A deletion (E44): chr1: g.216040210\_216042178del**

Proximal gttttaatgtgtccatttctaatttatttgggtactaataaaaaatggccc  
Deletion gttttaatgtgtccatttctaatttatttgggtactaataaaaaatggccc  
Distal ggtgatggccatgtaaaaacagaaacagaaattggagttatgctgtcaca

Proximal ttctaaagttttcaatgacagccctGtcaatctgcaattggtaaaaaattt  
Deletion ttctaaagttttcaatgacagccctCaagttggaagaggcaagaaaggg  
Distal agccaaggatttcttagggctaccCaagttggaagaggcaagaaaggg

Proximal accagtaacacttcaactatcaaaatgatgtgtacatgggggaggttcata  
Deletion tcttctacagagctttggaagggagtctggtccagaatacaaaactggttt  
Distal tcttctacagagctttggaagggagtctggtccagaatacaaaactggttt

**Figure S5. Visualization of microhomology at CNV breakpoints.**

Multiple sequence alignments. Sequences of 150 bp surrounding the junctions of each deletion were aligned to the proximal and distal reference sequences using ClustalW. The proximal and distal reference sequences are shown in blue and green respectively. The junction sequences are depicted in the color of the reference sequence they align with. Microhomology between the proximal and distal reference sequence and the junction are shown in red. (Verdin et al., PLoS Genet., 2013)

## Repetitive elements

**BEST1 deletion (E1-2): chr11: g.61711373\_61719810del**

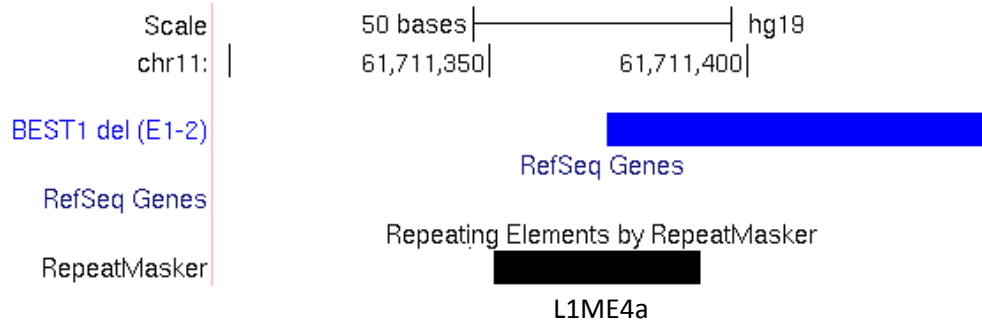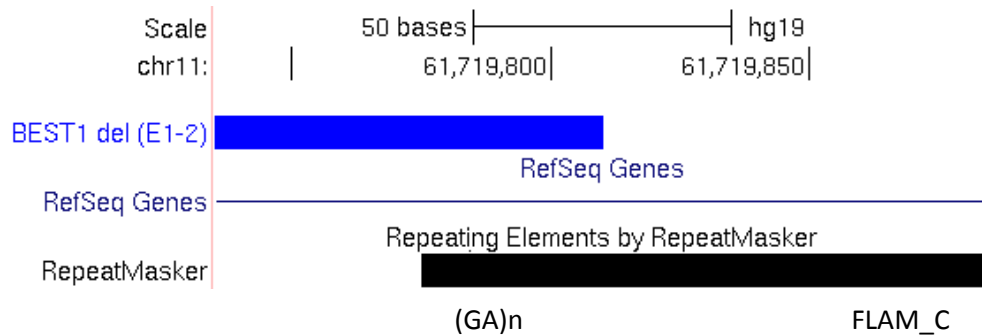

**KCNV2 deletion 1 (E2): chr9: g.2723737\_2766822del**

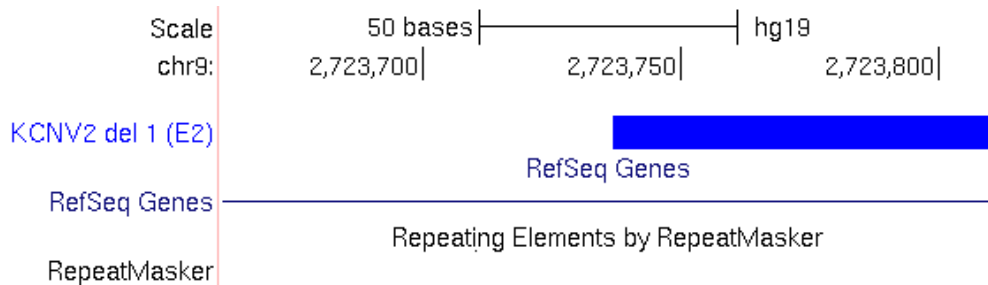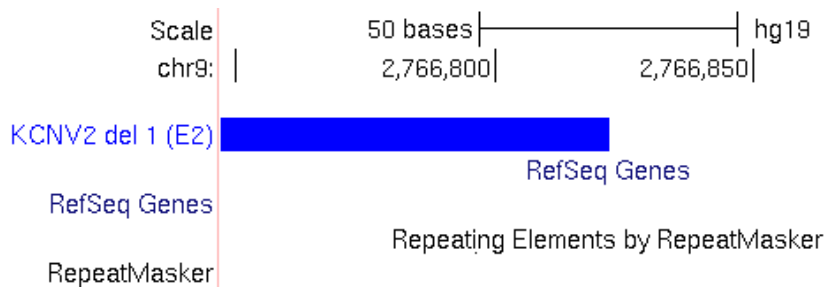

**KCNV2 deletion 2 (E2): chr9: g.2724293\_2730624del**

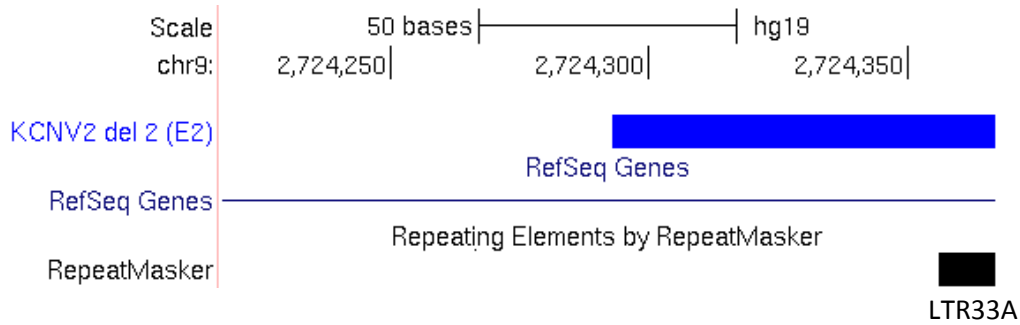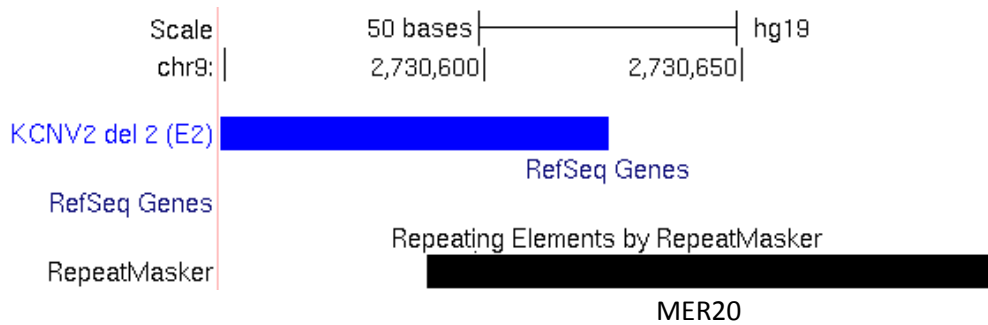

**MERTK deletion (E1-19): maximal deletion: chr2: g.111033904\_113207821del, minimal deletion: chr2: g.111392204\_113103622del**

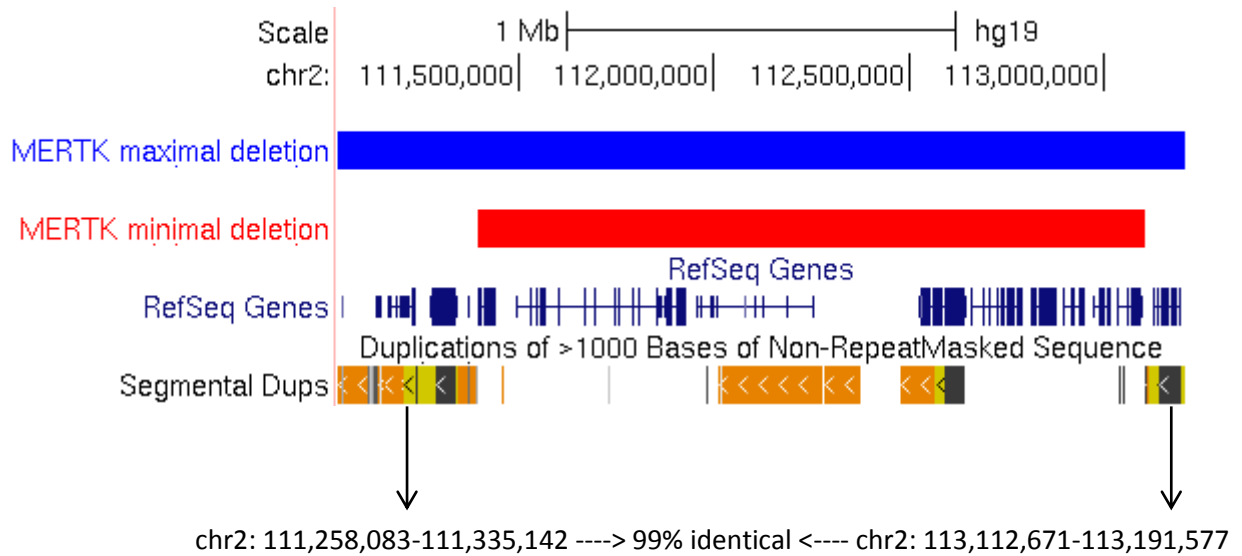



**PCDH15 deletion (E1): chr10: g.56478660\_57777934del**

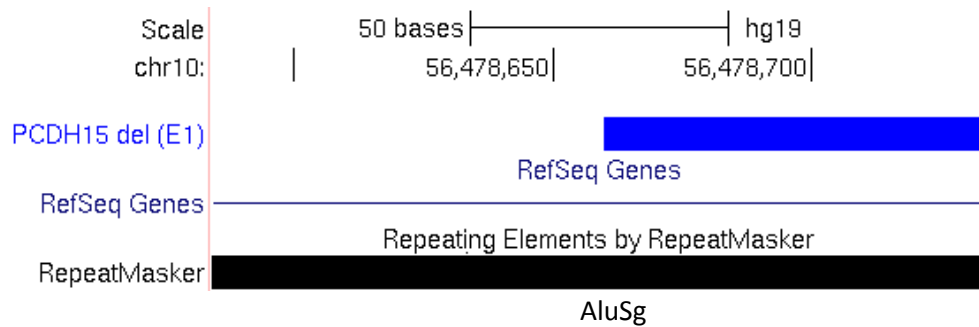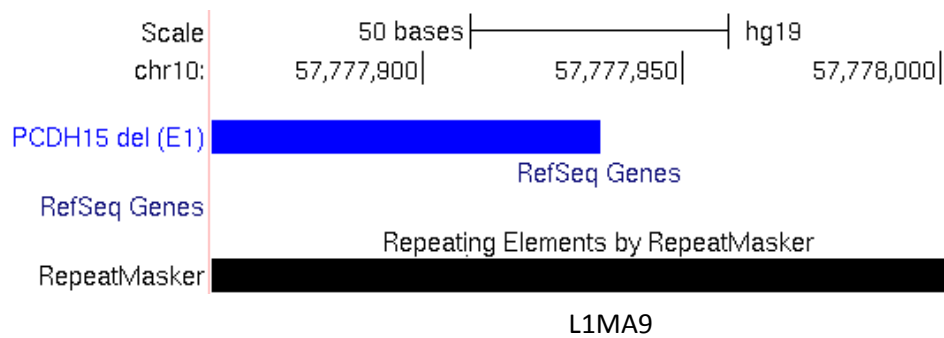

**PDE6G deletion (E3-4): chr17: g.79612725\_79619171del**

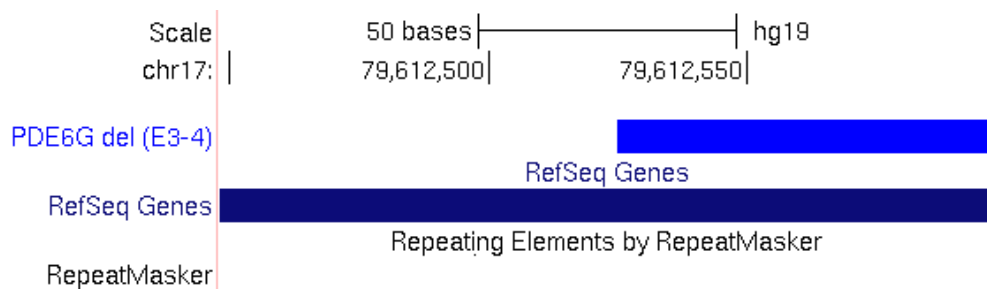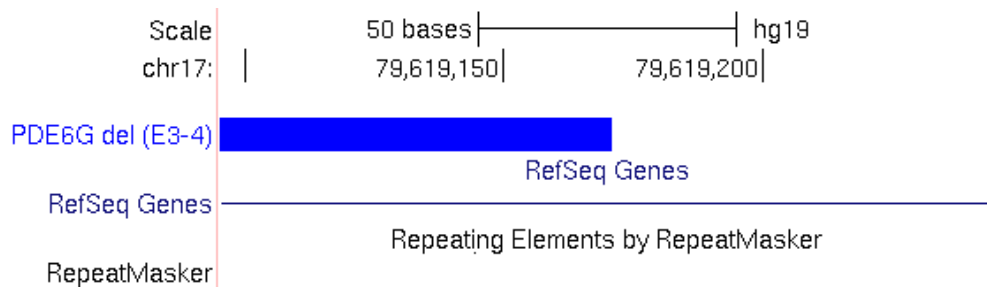

**PRPH2 deletion (E1-3): chr6: g.42631162\_42716988delinsTATTTTTT**

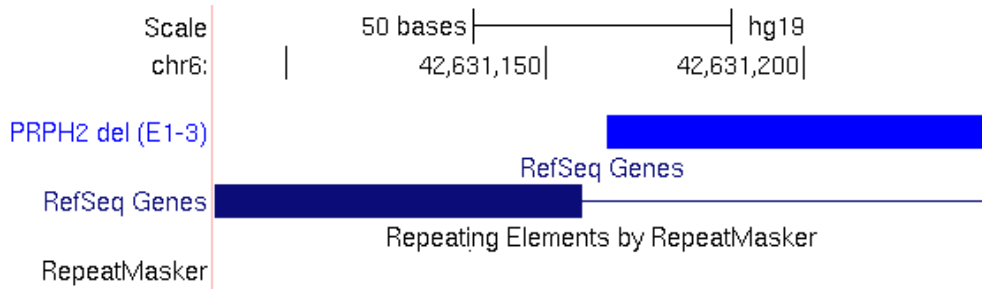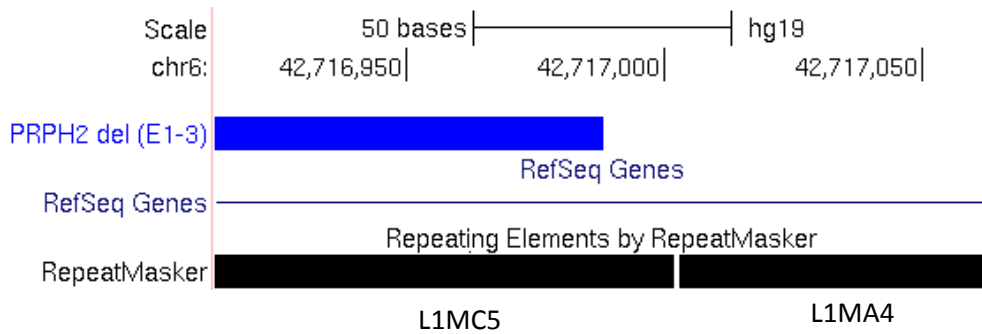

**SPATA7 deletion (E1-4): chr14: g.88845011\_88882321del**

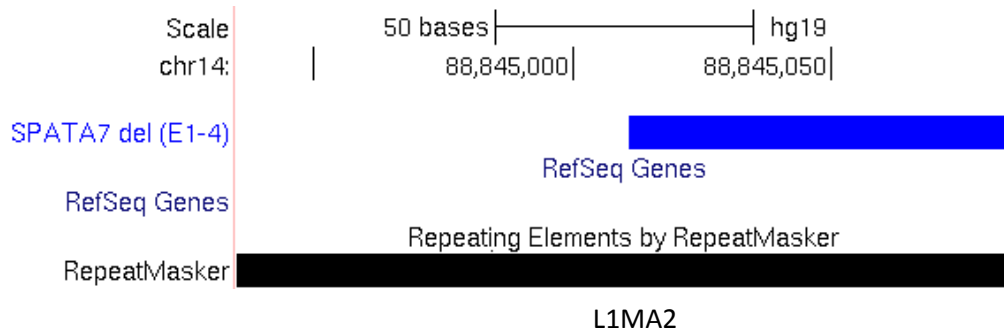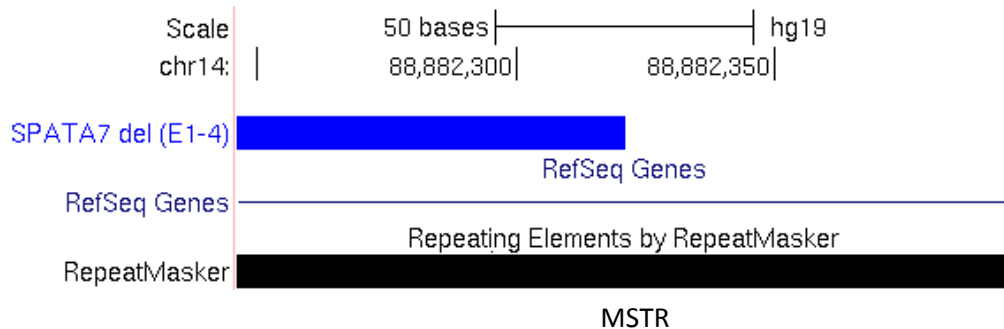

**USH2A deletion (E3): chr1: g.216589226\_216593365del**

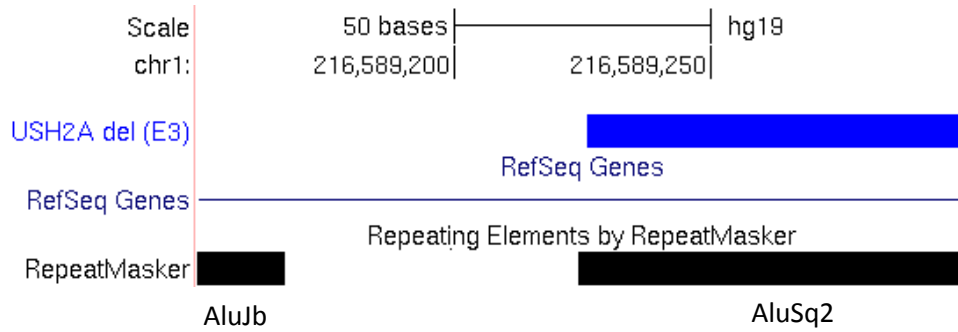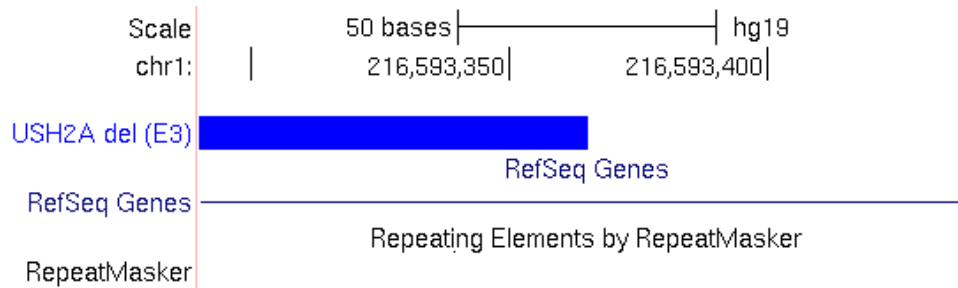

**USH2A deletion (E5-10): chr1: g.216465309\_216507632del**

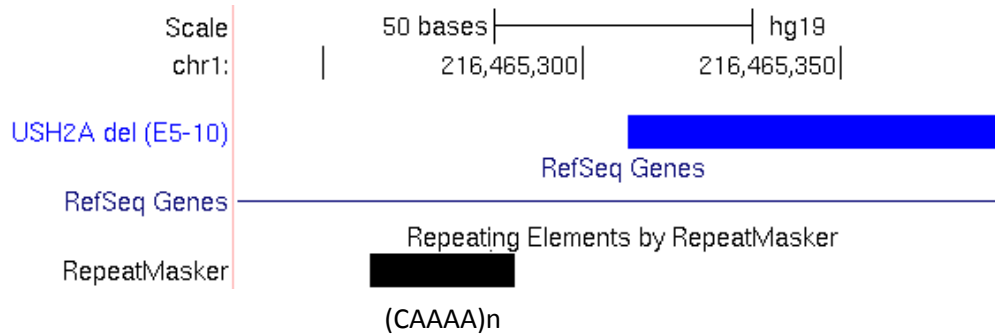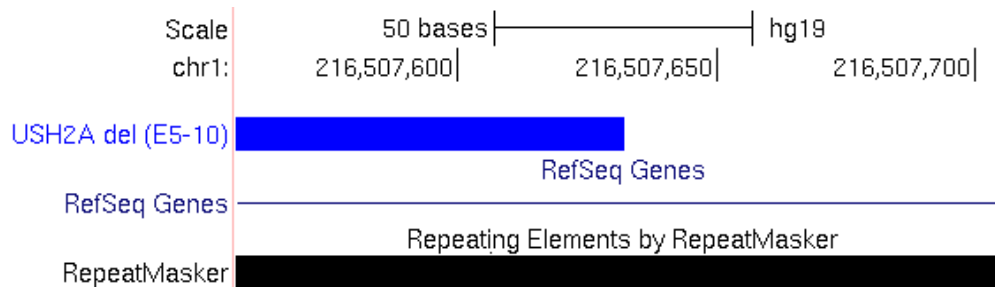

**USH2A deletion (E12-13): chr1: g.216415487\_216435280del**

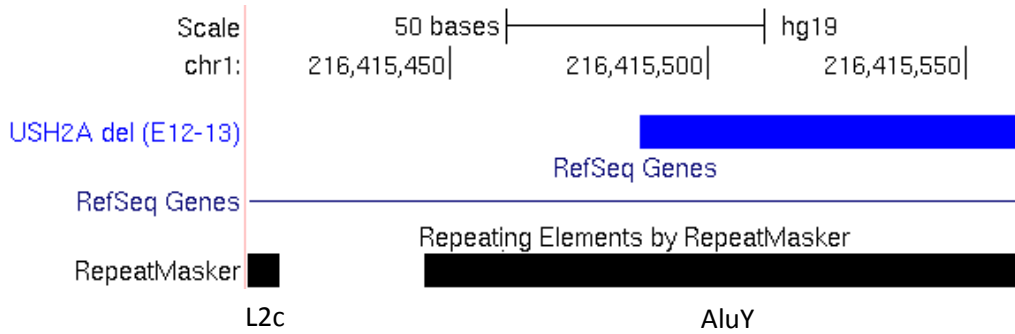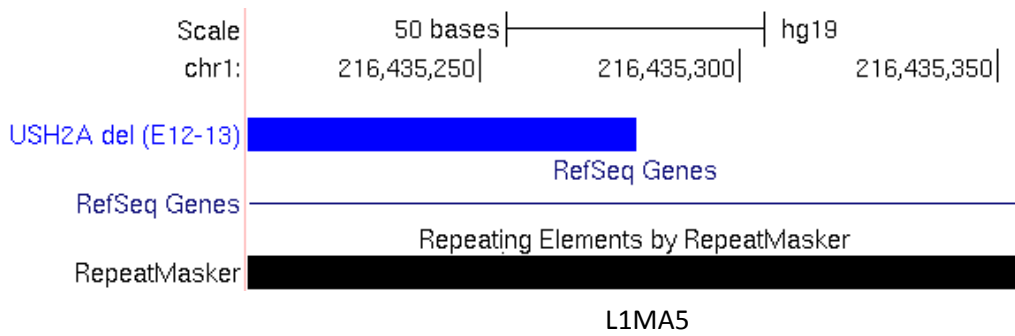

**USH2A deletion (E22-24): chr1: g.216259404\_216323160del**

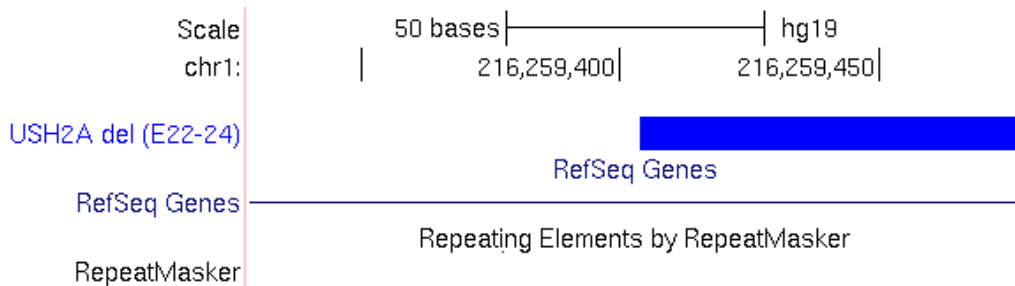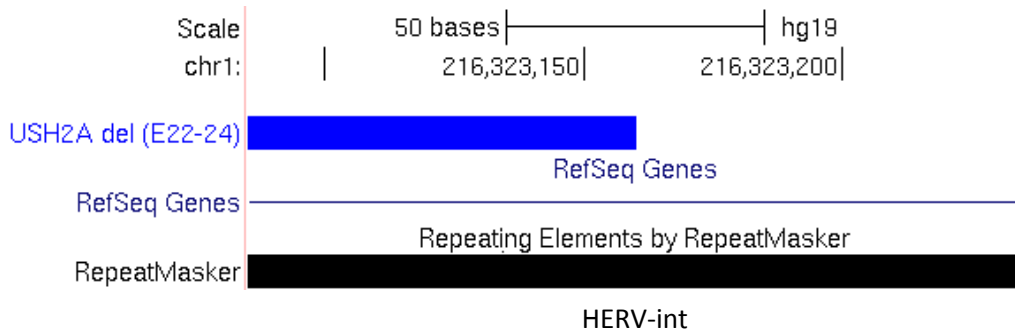

**USH2A deletion (E44): chr1: g.216040210\_216042178del**

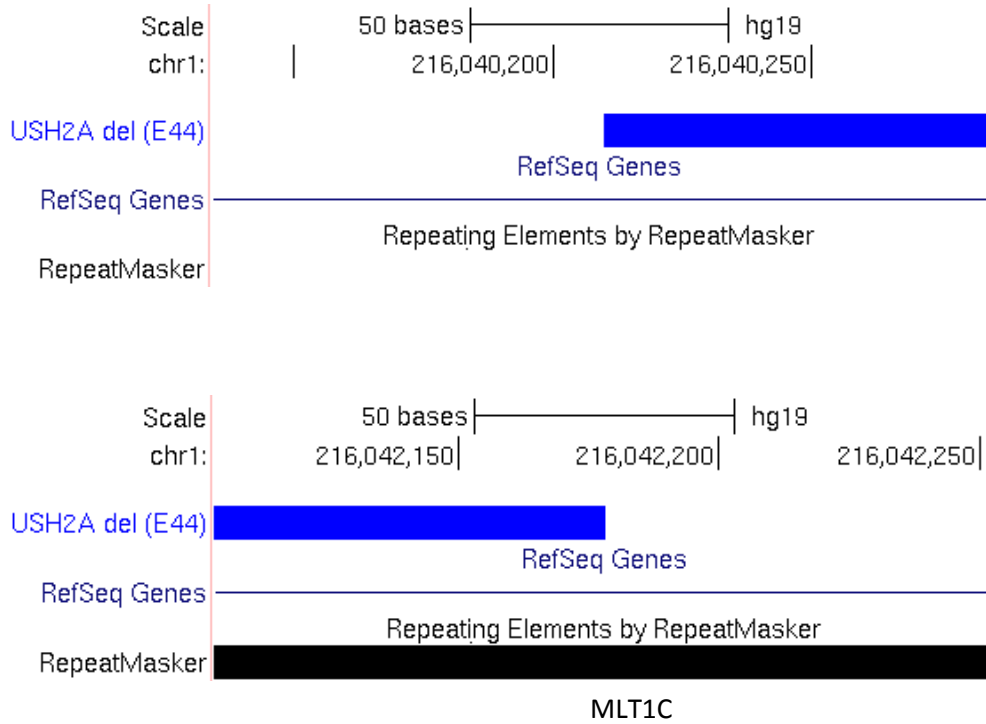

**Figure S6. Visualization of repetitive elements at CNV breakpoints.**

For every CNV that has been delineated at nucleotide level both breakpoint regions are shown in the UCSC genome browser displaying the RepeatMasker track.

## Sequence motifs

**BEST1 deletion (E1-2): chr11: g.61711373\_61719810del**

### 5'BP region

- Consensus SAR 4: 4
- Murine parvovirus recombination hotspot: 2
- Vaccinia topoisomerase I consensus: 1

### 3'BP region

- Deletion hotspot consensus: 1
- DNA polymerase arrest site: 1
- DNA polymerase a frameshift hotspot 1: 1
- DNA polymerase a/b frameshift hotspot 2: 1
- Heptamer recombination signal: 1
- Ig heavy chain class switch repeat 5: 1
- Murine parvovirus recombination hotspot: 1
- Vaccinia topoisomerase I consensus: 1

**KCNV2 deletion 1 (E2): chr9: g.2723737\_2766822del**

### 5'BP region

- Deletion hotspot consensus: 1
- Murine parvovirus recombination hotspot: 2

### 3'BP region

- Deletion hotspot consensus: 1
- Murine parvovirus recombination hotspot: 1
- Vaccinia topoisomerase I consensus: 1

**KCNV2 deletion 2 (E2): chr9: g.2724293\_2730624del**

### 5'BP region

- Consensus SAR 2: 2
- Consensus SAR 4: 2
- Deletion hotspot consensus: 1

3'BP region

- Deletion hotspot consensus: 1
- DNA polymerase arrest site: 1
- Vaccinia topoisomerase I consensus: 1

***PCDH15* deletion (E1): chr10: g.56478660\_57777934del**

5'BP region

- Consensus SAR 3: 1
- Deletion hotspot consensus: 2
- DNA polymerase arrest site: 1
- Ig heavy chain class switch repeat 3: 1

3'BP region

- Consensus SAR 2: 2
- Consensus SAR 3: 2
- Consensus SAR 4: 3
- Deletion hotspot consensus: 2

***PDE6G* deletion (E3-4): chr17: g.79612725\_79619171del**

5'BP region

- Deletion hotspot consensus: 4
- DNA polymerase arrest site: 2
- DNA polymerase b frameshift hotspot 1: 2
- Ig heavy chain class switch repeat 4: 1
- Translin-binding site 2: 1
- Vaccinia topoisomerase I consensus: 1

3'BP region

- DNA polymerase arrest site: 2

***PRPH2* deletion (E1-3): chr6: g.42631162\_42716988delinsTATTTTTT**

5'BP region

- Consensus SAR 3: 2

- Deletion hotspot consensus: 2
- DNA polymerase arrest site: 2
- Ig heavy chain class switch repeat 5: 1
- Vaccinia topoisomerase I consensus: 2

3'BP region

- Deletion hotspot consensus: 4
- DNA polymerase arrest site: 1
- DNA polymerase b frameshift hotspot 1: 1
- Murine parvovirus recombination hotspot: 1
- Vaccinia topoisomerase I consensus: 1

**SPATA7 deletion (E1-4): chr14: g.88845011\_88882321del**

5'BP region

- DNA polymerase arrest site: 1
- Murine parvovirus recombination hotspot: 2
- Vaccinia topoisomerase I consensus: 4

3'BP region

- Ig heavy chain class switch repeat 3: 1
- Ig heavy chain class switch repeat 4: 1
- Vaccinia topoisomerase I consensus: 2

**USH2A deletion (E3): chr1: g.216589226\_216593365del**

5'BP region

- Consensus SAR 3: 1
- Deletion hotspot consensus: 2
- DNA polymerase arrest site: 1
- Human minisatellites conserved sequence/X-like element: 1
- Ig heavy chain class switch repeat 5: 1
- Murine parvovirus recombination hotspot: 1
- Vaccinia topoisomerase I consensus: 1

3'BP region

- Consensus SAR 2: 1
- Consensus SAR 3: 5



- Consensus SAR 4: 2
- Murine parvovirus recombination hotspot: 1
- Vaccinia topoisomerase I consensus: 1

**USH2A deletion (E5-10): chr1: g.216465309\_216507632del**

5'BP region

- Consensus SAR 3: 1
- Consensus SAR 4: 1
- DNA polymerase a/b frameshift hotspot 2: 1
- Murine parvovirus recombination hotspot: 4
- Vaccinia topoisomerase I consensus: 1

3'BP region

- Translin-binding site 2: 1
- Vaccinia topoisomerase I consensus: 1

**USH2A deletion (E12-13): chr1: g.216415487\_216435280del**

5'BP region

- Consensus SAR 2: 6
- Consensus SAR 3: 1
- Consensus SAR 4: 11
- Deletion hotspot consensus: 1
- DNA polymerase arrest site: 1
- DNA polymerase a/b frameshift hotspot 1: 1
- DNA polymerase a/b frameshift hotspot 2: 1
- Ig heavy chain class switch repeat 3: 1
- Ig heavy chain class switch repeat 4: 1
- Murine MHC recombination hotspot: 1

3'BP region

- Deletion hotspot consensus: 2

**USH2A deletion (E22-24): chr1: g.216259404\_216323160del**

5'BP region

- Deletion hotspot consensus: 1

- DNA polymerase b frameshift hotspot 1: 1
- Vaccinia topoisomerase I consensus: 1

#### 3'BP region

- Deletion hotspot consensus: 1
- DNA polymerase b frameshift hotspot 1: 2
- Ig heavy chain class switch repeat 3: 2
- Ig heavy chain class switch repeat 4: 1

**USH2A deletion (E44): chr1: g.216040210\_216042178del**

#### 5'BP region

- Deletion hotspot consensus: 1
- DNA polymerase a frameshift hotspot 1: 1
- DNA polymerase b frameshift hotspot 1: 1
- Ig heavy chain class switch repeat 2: 1
- Ig heavy chain class switch repeat 4: 1
- Vaccinia topoisomerase I consensus: 1

#### 3'BP region

- DNA polymerase arrest site: 1
- DNA polymerase a/b frameshift hotspot 2: 1
- Ig heavy chain class switch repeat 1: 1
- Ig heavy chain class switch repeat 2: 1
- Vaccinia topoisomerase I consensus: 3

### **Figure S7. Overview of identified sequence motifs at CNV breakpoints.**

For every CNV that has been delineated at nucleotide level the presence of 40 previously described sequence motifs (Abeyasinghe et al., Hum. Mutat., 2003) has been assessed in both breakpoint regions using Fuzznuc (Rice et al., Trends Genet., 2000).
